# Supplementary material for: The evolution of anthropoid molar proportions
Source: PubMed Central journal article supplement (PMC4875740; doi:10.1186/s12862-016-0673-5), 2016-05-20
Supplement: 12862_2016_673_MOESM1_ESM.pdf [file 12862_2016_673_MOESM1_ESM.pdf]

## SUPPLEMENTARY INFORMATION

## The evolution of anthropoid molar proportions

Katherine E Carter<sup>1\*†</sup> and Steven Worthington<sup>2†</sup>

\*Correspondence:

carter@fas.harvard.edu,  
sworthington@iq.harvard.edu<sup>1</sup>Department of Human  
Evolutionary Biology, Harvard  
University, 11 Divinity Avenue,  
02138 Cambridge, USAFull list of author information is  
available at the end of the article

†Equal contributor

## Supplementary Tables

Table S1 Anthropoid ( $n = 100$ ) lower molar proportions, body mass, and diet summary data

| Genus                 | Species              | $n$ | $M_1$ area | $M_2$ area | $M_3$ area | $M_2/M_1$ | $M_3/M_1$ | BM*   | PDC*     |
|-----------------------|----------------------|-----|------------|------------|------------|-----------|-----------|-------|----------|
| <i>Alouatta</i>       | <i>belzebul</i>      | 13  | 35.41      | 41.24      | 41.12      | 1.17      | 1.16      | 6.39  | fruit    |
| <i>Alouatta</i>       | <i>caraya</i>        | 20  | 32.62      | 38.91      | 41.70      | 1.19      | 1.28      | 5.38  | leaves   |
| <i>Alouatta</i>       | <i>guariba</i>       | 18  | 34.04      | 39.87      | 42.60      | 1.17      | 1.25      | 5.54  | leaves   |
| <i>Alouatta</i>       | <i>palliata</i>      | 18  | 39.23      | 45.86      | 43.78      | 1.17      | 1.12      | 6.25  | leaves   |
| <i>Alouatta</i>       | <i>seniculus</i>     | 34  | 39.36      | 45.11      | 44.69      | 1.15      | 1.14      | 5.92  | leaves   |
| <i>Ateles</i>         | <i>geoffroyi</i>     | 25  | 25.14      | 25.10      | 20.76      | 1.00      | 0.83      | 7.54  | fruit    |
| <i>Ateles</i>         | <i>paniscus</i>      | 22  | 25.17      | 24.47      | 19.94      | 0.97      | 0.79      | 8.78  | fruit    |
| <i>Brachyteles</i>    | <i>arachnoides</i>   | 8   | 42.40      | 42.40      | 34.08      | 1.00      | 0.81      | 8.84  | leaves   |
| <i>Lagothrix</i>      | <i>lagotricha</i>    | 19  | 27.37      | 30.81      | 25.57      | 1.13      | 0.93      | 7.15  | fruit    |
| <i>Callithrix</i>     | <i>jacchus</i>       | 13  | 4.95       | 3.35       | 0.00       | 0.67      | 0.00      | 0.37  | omnivore |
| <i>Callithrix</i>     | <i>pygmaea</i>       | 33  | 2.37       | 1.81       | 0.00       | 0.77      | 0.00      | 0.12  | insects  |
| <i>Leontopithecus</i> | <i>rosalia</i>       | 8   | 8.29       | 6.45       | 0.00       | 0.78      | 0.00      | 0.64  | insects  |
| <i>Saguinus</i>       | <i>fuscicollis</i>   | 33  | 4.69       | 3.41       | 0.00       | 0.73      | 0.00      | 0.35  | fruit    |
| <i>Saguinus</i>       | <i>midas</i>         | 55  | 4.74       | 3.30       | 0.00       | 0.70      | 0.00      | 0.55  | insects  |
| <i>Saguinus</i>       | <i>oedipus</i>       | 36  | 5.77       | 3.79       | 0.00       | 0.66      | 0.00      | 0.41  | insects  |
| <i>Aotus</i>          | <i>trivirgatus</i>   | 46  | 8.75       | 8.75       | 6.95       | 1.00      | 0.80      | 0.77  | fruit    |
| <i>Cebus</i>          | <i>apella</i>        | 34  | 21.37      | 18.51      | 11.65      | 0.87      | 0.55      | 3.08  | fruit    |
| <i>Cebus</i>          | <i>capucinus</i>     | 47  | 20.60      | 17.49      | 13.14      | 0.85      | 0.64      | 3.11  | fruit    |
| <i>Saimiri</i>        | <i>oerstedii</i>     | 29  | 6.45       | 5.22       | 3.31       | 0.81      | 0.51      | 0.79  | fruit    |
| <i>Saimiri</i>        | <i>sciureus</i>      | 39  | 6.76       | 5.53       | 3.53       | 0.82      | 0.52      | 0.82  | animals  |
| <i>Cacajao</i>        | <i>calvus</i>        | 14  | 18.58      | 17.91      | 13.46      | 0.96      | 0.72      | 3.17  | fruit    |
| <i>Callicebus</i>     | <i>moloch</i>        | 17  | 10.33      | 10.45      | 8.29       | 1.02      | 0.81      | 0.99  | fruit    |
| <i>Callicebus</i>     | <i>torquatus</i>     | 20  | 11.00      | 10.73      | 7.89       | 0.98      | 0.72      | 1.25  | fruit    |
| <i>Chiropotes</i>     | <i>satanas</i>       | 28  | 12.92      | 11.71      | 8.93       | 0.91      | 0.69      | 2.74  | fruit    |
| <i>Pithecia</i>       | <i>pithecia</i>      | 23  | 11.59      | 11.94      | 10.99      | 1.03      | 0.95      | 1.76  | fruit    |
| <i>Allenopithecus</i> | <i>nigroviridis</i>  | 14  | 24.61      | 33.43      | 27.45      | 1.36      | 1.11      | 4.68  | fruit    |
| <i>Allochrocebus</i>  | <i>lhoesti</i>       | 25  | 26.78      | 34.12      | 28.61      | 1.28      | 1.07      | 4.71  | leaves   |
| <i>Allochrocebus</i>  | <i>preussi</i>       | 14  | 23.11      | 30.60      | 25.59      | 1.32      | 1.11      | 4.50  | fruit    |
| <i>Cercopithecus</i>  | <i>ascanius</i>      | 50  | 18.51      | 24.94      | 20.54      | 1.35      | 1.11      | 3.31  | fruit    |
| <i>Cercopithecus</i>  | <i>cephus</i>        | 40  | 20.17      | 26.37      | 20.99      | 1.31      | 1.04      | 3.58  | fruit    |
| <i>Cercopithecus</i>  | <i>diana</i>         | 34  | 23.98      | 30.77      | 25.40      | 1.29      | 1.06      | 4.55  | fruit    |
| <i>Cercopithecus</i>  | <i>erythrogaster</i> | 6   | 20.55      | 27.57      | 21.23      | 1.34      | 1.03      | 3.25  | fruit    |
| <i>Cercopithecus</i>  | <i>erythrotis</i>    | 9   | 19.54      | 25.43      | 20.71      | 1.30      | 1.06      | 3.25  | fruit    |
| <i>Cercopithecus</i>  | <i>mitis</i>         | 37  | 25.20      | 33.61      | 27.71      | 1.33      | 1.10      | 4.89  | fruit    |
| <i>Cercopithecus</i>  | <i>mona</i>          | 27  | 20.68      | 28.56      | 23.81      | 1.38      | 1.15      | 3.80  | fruit    |
| <i>Cercopithecus</i>  | <i>neglectus</i>     | 37  | 24.15      | 33.12      | 28.68      | 1.38      | 1.19      | 5.70  | fruit    |
| <i>Cercopithecus</i>  | <i>nictitans</i>     | 45  | 22.97      | 31.78      | 26.20      | 1.39      | 1.14      | 5.46  | fruit    |
| <i>Cercopithecus</i>  | <i>petaurista</i>    | 17  | 20.87      | 27.97      | 22.63      | 1.34      | 1.09      | 4.13  | leaves   |
| <i>Cercopithecus</i>  | <i>pogonias</i>      | 50  | 20.32      | 28.46      | 22.41      | 1.40      | 1.11      | 3.58  | fruit    |
| <i>Cercopithecus</i>  | <i>wolfi</i>         | 36  | 18.57      | 26.19      | 21.93      | 1.41      | 1.18      | 3.39  | fruit    |
| <i>Chlorocebus</i>    | <i>aethiops</i>      | 114 | 25.47      | 34.81      | 29.46      | 1.37      | 1.16      | 4.14  | fruit    |
| <i>Erythrocebus</i>   | <i>patas</i>         | 29  | 31.92      | 45.09      | 38.07      | 1.42      | 1.20      | 3.87  | omnivore |
| <i>Miopithecus</i>    | <i>talapoin</i>      | 42  | 10.88      | 13.97      | 11.20      | 1.28      | 1.03      | 2.25  | fruit    |
| <i>Colobus</i>        | <i>guereza</i>       | 60  | 38.07      | 48.66      | 56.86      | 1.28      | 1.49      | 8.26  | leaves   |
| <i>Colobus</i>        | <i>polykomos</i>     | 84  | 35.67      | 43.82      | 49.75      | 1.23      | 1.40      | 9.10  | leaves   |
| <i>Colobus</i>        | <i>satanas</i>       | 44  | 35.87      | 41.34      | 46.40      | 1.15      | 1.30      | 4.23  | seeds    |
| <i>Nasalis</i>        | <i>larvatus</i>      | 15  | 36.90      | 48.76      | 58.86      | 1.32      | 1.60      | 15.11 | leaves   |
| <i>Ptilocolobus</i>   | <i>badius</i>        | 40  | 34.64      | 41.67      | 48.66      | 1.20      | 1.41      | 10.28 | leaves   |
| <i>Ptilocolobus</i>   | <i>kirkee</i>        | 11  | 26.22      | 31.40      | 36.80      | 1.20      | 1.40      | 5.63  | leaves   |
| <i>Presbytis</i>      | <i>comata</i>        | 15  | 26.30      | 30.10      | 28.92      | 1.15      | 1.10      | 6.70  | leaves   |
| <i>Presbytis</i>      | <i>melalophos</i>    | 30  | 24.19      | 26.99      | 23.78      | 1.12      | 0.98      | 6.53  | fruit    |
| <i>Presbytis</i>      | <i>potenziani</i>    | 20  | 33.75      | 40.30      | 39.11      | 1.19      | 1.16      | 6.36  | leaves   |
| <i>Presbytis</i>      | <i>rubicunda</i>     | 33  | 24.00      | 24.57      | 24.91      | 1.02      | 1.04      | 6.18  | leaves   |
| <i>Presbytis</i>      | <i>thomasi</i>       | 7   | 27.11      | 30.14      | 31.37      | 1.11      | 1.16      | 6.73  | leaves   |
| <i>Procolobus</i>     | <i>verus</i>         | 45  | 20.25      | 24.41      | 28.76      | 1.21      | 1.42      | 4.45  | leaves   |
| <i>Pygathrix</i>      | <i>nemaeus</i>       | 21  | 32.71      | 40.99      | 48.55      | 1.26      | 1.49      | 9.72  | leaves   |
| <i>Rhinopithecus</i>  | <i>roxellana</i>     | 5   | 44.41      | 62.02      | 72.92      | 1.40      | 1.65      | 14.75 | leaves   |

Continued on next page . . .

| Genus                 | Species                | <i>n</i> | $M_1$ area | $M_2$ area | $M_3$ area | $M_2/M_1$ | $M_3/M_1$ | BM*    | PDC*     |
|-----------------------|------------------------|----------|------------|------------|------------|-----------|-----------|--------|----------|
| <i>Semnopithecus</i>  | <i>entellus</i>        | 100      | 42.05      | 54.40      | 62.26      | 1.29      | 1.47      | 10.21  | leaves   |
| <i>Simias</i>         | <i>concolor</i>        | 15       | 29.99      | 39.33      | 46.98      | 1.31      | 1.57      | 7.97   | leaves   |
| <i>Trachypithecus</i> | <i>cristatus</i>       | 39       | 33.18      | 43.42      | 45.40      | 1.31      | 1.37      | 6.18   | leaves   |
| <i>Trachypithecus</i> | <i>francoisi</i>       | 8        | 30.72      | 36.24      | 40.63      | 1.18      | 1.32      | 7.88   | leaves   |
| <i>Trachypithecus</i> | <i>obscurus</i>        | 44       | 26.80      | 34.20      | 34.91      | 1.28      | 1.30      | 7.41   | leaves   |
| <i>Trachypithecus</i> | <i>pileatus</i>        | 13       | 34.35      | 42.09      | 43.61      | 1.23      | 1.27      | 11.34  | leaves   |
| <i>Trachypithecus</i> | <i>vetulus</i>         | 44       | 28.74      | 35.68      | 40.32      | 1.24      | 1.40      | 7.04   | leaves   |
| <i>Cercocebus</i>     | <i>agilis</i>          | 21       | 41.03      | 56.50      | 51.47      | 1.38      | 1.26      | 7.38   | omnivore |
| <i>Cercocebus</i>     | <i>torquatus</i>       | 37       | 45.90      | 60.77      | 62.31      | 1.33      | 1.36      | 8.78   | fruit    |
| <i>Lophocebus</i>     | <i>albigena</i>        | 69       | 32.88      | 44.70      | 40.85      | 1.36      | 1.25      | 6.57   | fruit    |
| <i>Macaca</i>         | <i>fascicularis</i>    | 28       | 27.71      | 38.66      | 41.77      | 1.40      | 1.51      | 4.46   | fruit    |
| <i>Macaca</i>         | <i>fuscata</i>         | 39       | 42.62      | 62.96      | 74.48      | 1.48      | 1.75      | 11.83  | fruit    |
| <i>Macaca</i>         | <i>hecki</i>           | 24       | 38.92      | 52.71      | 55.11      | 1.36      | 1.42      | 9.00   | fruit    |
| <i>Macaca</i>         | <i>maura</i>           | 7        | 37.37      | 55.38      | 66.30      | 1.49      | 1.78      | 7.88   | fruit    |
| <i>Macaca</i>         | <i>mulatta</i>         | 61       | 34.04      | 49.00      | 58.21      | 1.44      | 1.71      | 6.61   | fruit    |
| <i>Macaca</i>         | <i>nemestrina</i>      | 43       | 40.97      | 57.67      | 72.04      | 1.41      | 1.76      | 8.85   | fruit    |
| <i>Macaca</i>         | <i>nigra</i>           | 40       | 36.34      | 52.78      | 60.63      | 1.46      | 1.67      | 7.68   | fruit    |
| <i>Macaca</i>         | <i>ochreata</i>        | 9        | 35.78      | 48.82      | 57.88      | 1.36      | 1.62      | 3.95   | fruit    |
| <i>Macaca</i>         | <i>silenus</i>         | 4        | 30.69      | 46.14      | 52.58      | 1.50      | 1.70      | 6.42   | fruit    |
| <i>Macaca</i>         | <i>sinica</i>          | 39       | 28.18      | 38.71      | 41.16      | 1.37      | 1.46      | 4.44   | fruit    |
| <i>Macaca</i>         | <i>sylvanus</i>        | 4        | 40.10      | 55.69      | 71.54      | 1.39      | 1.79      | 12.09  | omnivore |
| <i>Macaca</i>         | <i>tonkeana</i>        | 24       | 45.38      | 60.69      | 61.94      | 1.34      | 1.37      | 11.95  | fruit    |
| <i>Mandrillus</i>     | <i>leucophaeus</i>     | 35       | 71.51      | 112.83     | 132.25     | 1.58      | 1.85      | 15.00  | omnivore |
| <i>Mandrillus</i>     | <i>sphinx</i>          | 10       | 66.50      | 108.27     | 124.72     | 1.65      | 1.89      | 23.60  | omnivore |
| <i>Papio</i>          | <i>anubis</i>          | 10       | 79.17      | 122.04     | 143.78     | 1.54      | 1.82      | 19.20  | omnivore |
| <i>Papio</i>          | <i>cynocephalus</i>    | 35       | 59.44      | 87.89      | 108.26     | 1.48      | 1.82      | 17.05  | fruit    |
| <i>Papio</i>          | <i>hamadryas</i>       | 25       | 68.31      | 112.18     | 132.51     | 1.65      | 1.95      | 14.15  | omnivore |
| <i>Papio</i>          | <i>ursinus</i>         | 6        | 82.72      | 126.46     | 157.02     | 1.53      | 1.91      | 22.30  | fruit    |
| <i>Theropithecus</i>  | <i>gelada</i>          | 25       | 66.05      | 103.18     | 132.48     | 1.56      | 2.01      | 15.35  | leaves   |
| <i>Gorilla</i>        | <i>gorilla gorilla</i> | 35       | 191.80     | 235.33     | 217.27     | 1.23      | 1.13      | 120.95 | fruit    |
| <i>Homo</i>           | <i>sapiens</i>         | 20       | 107.16     | 108.92     | 109.52     | 1.02      | 1.02      | 67.10  | omnivore |
| <i>Pan</i>            | <i>paniscus</i>        | 25       | 79.32      | 85.83      | 70.11      | 1.08      | 0.89      | 39.10  | fruit    |
| <i>Pan</i>            | <i>trog. schwein.</i>  | 26       | 101.22     | 114.49     | 101.23     | 1.13      | 1.00      | 38.20  | fruit    |
| <i>Pan</i>            | <i>trog. trog.</i>     | 38       | 99.49      | 109.96     | 99.04      | 1.11      | 1.00      | 52.75  | fruit    |
| <i>Pongo</i>          | <i>abelii</i>          | 7        | 131.40     | 154.23     | 143.31     | 1.17      | 1.09      | 56.75  | fruit    |
| <i>Pongo</i>          | <i>pygmaeus</i>        | 38       | 140.16     | 157.27     | 144.31     | 1.12      | 1.03      | 57.15  | fruit    |
| <i>Hoolock</i>        | <i>hoolock</i>         | 28       | 35.22      | 45.71      | 42.35      | 1.30      | 1.21      | 6.88   | fruit    |
| <i>Hylobates</i>      | <i>agilis</i>          | 16       | 27.58      | 30.54      | 29.52      | 1.11      | 1.07      | 5.85   | fruit    |
| <i>Hylobates</i>      | <i>klossii</i>         | 16       | 24.66      | 27.17      | 21.34      | 1.10      | 0.87      | 5.79   | fruit    |
| <i>Hylobates</i>      | <i>lar</i>             | 32       | 28.63      | 33.76      | 32.61      | 1.18      | 1.14      | 5.64   | fruit    |
| <i>Hylobates</i>      | <i>pileatus</i>        | 4        | 29.28      | 32.03      | 33.39      | 1.10      | 1.15      | 5.47   | fruit    |
| <i>Nomascus</i>       | <i>concolor</i>        | 19       | 30.38      | 36.43      | 33.19      | 1.20      | 1.10      | 7.71   | fruit    |
| <i>Symphalangus</i>   | <i>syndactylus</i>     | 26       | 44.42      | 55.00      | 51.40      | 1.24      | 1.16      | 11.24  | fruit    |

\*BM = body mass (kg), sources [1–7]. PDC = primary dietary category, sources: [8–35]

**Table S2** Molar area proportion PGLMM posterior probabilities.

| Taxon            | Slope (Interspecific)         |                               |                               |
|------------------|-------------------------------|-------------------------------|-------------------------------|
|                  | $\mathbb{P} \in [1.95, 2.05]$ | $\mathbb{P} \in [1.90, 2.10]$ | $\mathbb{P} \in [1.85, 2.15]$ |
| Anthropoidea     | 0.047                         | 0.102                         | 0.184                         |
| Platyrrhini      | 0.132                         | 0.264                         | 0.395                         |
| Platyrrhini*     | 0.082                         | 0.168                         | 0.259                         |
| Catarrhini       | 0.024                         | 0.056                         | 0.098                         |
| Hominoidea       | 0.001                         | 0.003                         | 0.005                         |
| Cercopithecoidea | 0.075                         | 0.162                         | 0.253                         |
| Colobinae        | 0.015                         | 0.034                         | 0.054                         |
| Cercopithecinae  | 0.167                         | 0.329                         | 0.480                         |
| Cercopithecini   | <0.001                        | <0.001                        | <0.001                        |
| Papionini        | 0.123                         | 0.243                         | 0.353                         |

  

| Taxon            | Intercept                       |                                 |                                 |
|------------------|---------------------------------|---------------------------------|---------------------------------|
|                  | $\mathbb{P} \in [-0.95, -1.05]$ | $\mathbb{P} \in [-0.90, -1.10]$ | $\mathbb{P} \in [-0.85, -1.15]$ |
| Anthropoidea     | 0.190                           | 0.366                           | 0.519                           |
| Platyrrhini      | 0.076                           | 0.156                           | 0.233                           |
| Platyrrhini*     | 0.186                           | 0.352                           | 0.502                           |
| Catarrhini       | 0.109                           | 0.223                           | 0.330                           |
| Hominoidea       | 0.006                           | 0.011                           | 0.018                           |
| Cercopithecoidea | 0.139                           | 0.272                           | 0.408                           |
| Colobinae        | 0.022                           | 0.040                           | 0.059                           |
| Cercopithecinae  | 0.042                           | 0.089                           | 0.135                           |
| Cercopithecini   | 0.003                           | 0.006                           | 0.010                           |
| Papionini        | 0.053                           | 0.109                           | 0.164                           |

<sup>P</sup> posterior probability of parameter estimate being inside the ROPE

\* non-callitrichin platyrrhines

**Table S3** Relative  $M_2$  area PGLMM posterior probabilities.

| Taxon            | Slope (Interspecific)           |                                 |                                 |
|------------------|---------------------------------|---------------------------------|---------------------------------|
|                  | $\mathbb{P} \in [0.328, 0.338]$ | $\mathbb{P} \in [0.323, 0.343]$ | $\mathbb{P} \in [0.318, 0.348]$ |
| Anthropoidea     | <0.001                          | <0.001                          | 0.015                           |
| Platyrrhini      | 0.009                           | 0.080                           | 0.465                           |
| Platyrrhini*     | 0.009                           | 0.061                           | 0.270                           |
| Catarrhini       | <0.001                          | 0.001                           | 0.044                           |
| Hominoidea       | 0.003                           | 0.010                           | 0.030                           |
| Cercopithecoidea | 0.151                           | 0.602                           | 0.942                           |
| Colobinae        | 0.193                           | 0.414                           | 0.645                           |
| Cercopithecinae  | 0.245                           | 0.678                           | 0.941                           |
| Cercopithecini   | <0.001                          | <0.001                          | <0.001                          |
| Papionini        | 0.259                           | 0.554                           | 0.811                           |

  

| Taxon            | Intercept                      |                                |                                |
|------------------|--------------------------------|--------------------------------|--------------------------------|
|                  | $\mathbb{P} \in [-0.05, 0.05]$ | $\mathbb{P} \in [-0.10, 0.10]$ | $\mathbb{P} \in [-0.15, 0.15]$ |
| Anthropoidea     | 0.028                          | 0.054                          | 0.080                          |
| Platyrrhini      | 0.062                          | 0.125                          | 0.198                          |
| Platyrrhini*     | 0.111                          | 0.217                          | 0.321                          |
| Catarrhini       | 0.024                          | 0.047                          | 0.071                          |
| Hominoidea       | 0.011                          | 0.023                          | 0.034                          |
| Cercopithecoidea | 0.016                          | 0.030                          | 0.046                          |
| Colobinae        | 0.037                          | 0.071                          | 0.103                          |
| Cercopithecinae  | <0.001                         | 0.001                          | 0.002                          |
| Cercopithecini   | 0.068                          | 0.141                          | 0.211                          |
| Papionini        | 0.010                          | 0.018                          | 0.028                          |

<sup>P</sup> posterior probability of parameter estimate being inside the ROPE

\* non-callitrichin platyrrhines

**Table S4** Proportion mediated ( $pr_m$ ) PGLMM posterior probabilities.

| Taxon            | $pr_m$ (Interspecific)    |                           |
|------------------|---------------------------|---------------------------|
|                  | $\mathbb{P} \in [0.9, 1]$ | $\mathbb{P} \in [0.8, 1]$ |
| Anthropoidea     | <0.001                    | 0.009                     |
| Platyrrhini      | <0.001                    | 0.004                     |
| Platyrrhini*     | 0.003                     | 0.014                     |
| Catarrhini       | 0.001                     | 0.049                     |
| Homoidea         | 0.141                     | 0.294                     |
| Cercopithecoidea | 0.233                     | 0.802                     |
| Colobinae        | 0.274                     | 0.607                     |
| Cercopithecinae  | 0.190                     | 0.667                     |
| Cercopithecini   | 0.415                     | 0.796                     |
| Papionini        | 0.262                     | 0.652                     |

<sup>‡</sup> posterior probability of parameter estimate being inside the ROPE

\* non-callitrichin platyrrhines

**Table S5** Modern human ( $n = 66$ ) lower molar proportions.\*

| Population | $M_2/M_1$ | $M_3/M_1$ | Population | $M_2/M_1$ | $M_3/M_1$ |
|------------|-----------|-----------|------------|-----------|-----------|
| Australia  | 0.88      | 0.85      | USA (Ohio) | 0.92      | 0.95      |
| Australia  | 1.05      | 1.10      | USA (Ohio) | 0.90      | 0.81      |
| Australia  | 1.17      | 1.04      | USA (Ohio) | 0.94      | 0.90      |
| Australia  | 0.94      | 0.79      | USA (Ohio) | 0.87      | 0.89      |
| Australia  | 1.01      | 0.77      | USA (Ohio) | 0.83      | 0.94      |
| Egypt      | 1.00      | 0.00      | USA (Ohio) | 0.93      | 0.88      |
| Egypt      | 0.86      | 0.00      | USA (Ohio) | 0.91      | 0.82      |
| Egypt      | 1.01      | 0.00      | USA (Ohio) | 0.84      | 0.97      |
| Egypt      | 0.89      | 0.95      | USA (Ohio) | 0.79      | 0.73      |
| Egypt      | 1.04      | 0.92      | USA (Ohio) | 0.85      | 0.71      |
| Egypt      | 1.03      | 0.88      | USA (Ohio) | 0.87      | 0.71      |
| Egypt      | 1.00      | 0.97      | USA (Ohio) | 1.02      | 0.78      |
| Egypt      | 0.90      | 0.88      | USA (Ohio) | 0.85      | 0.78      |
| Egypt      | 0.87      | 1.00      | Yugoslavia | 0.95      | 0.93      |
| Egypt      | 0.89      | 0.88      | Yugoslavia | 1.07      | 0.95      |
| Egypt      | 0.94      | 0.93      | Yugoslavia | 0.96      | 0.98      |
| Egypt      | 0.95      | 0.00      | Yugoslavia | 0.84      | 0.91      |
| Egypt      | 0.94      | 0.91      | Yugoslavia | 1.00      | 1.02      |
| Egypt      | 0.92      | 0.91      | Yugoslavia | 0.93      | 0.79      |
| Egypt      | 0.90      | 0.80      | Yugoslavia | 0.96      | 0.87      |
| Egypt      | 1.00      | 0.86      | Yugoslavia | 0.91      | 0.84      |
| Egypt      | 0.94      | 0.87      | Yugoslavia | 0.93      | 0.80      |
| Egypt      | 0.95      | 0.97      | Yugoslavia | 0.86      | 0.89      |
| Egypt      | 1.00      | 0.88      | Yugoslavia | 0.89      | 0.00      |
| Egypt      | 1.05      | 0.91      | Yugoslavia | 0.95      | 0.81      |
| Iceland    | 0.96      | 0.98      | Yugoslavia | 0.96      | 0.92      |
| USA (Ohio) | 0.93      | 0.77      | Yugoslavia | 0.81      | 0.00      |
| USA (Ohio) | 0.86      | 0.95      | Yugoslavia | 0.96      | 0.90      |
| USA (Ohio) | 0.89      | 0.82      | Yugoslavia | 0.81      | 0.88      |
| USA (Ohio) | 0.99      | 0.81      | Yugoslavia | 0.98      | 0.91      |
| USA (Ohio) | 0.85      | 0.92      | Yugoslavia | 1.08      | 0.90      |
| USA (Ohio) | 0.81      | 0.73      | Yugoslavia | 0.94      | 0.82      |
| USA (Ohio) | 0.93      | 0.82      | Yugoslavia | 1.02      | 0.89      |

\* Data collected on specimens from the Museum of Comparative Zoology, Harvard.

**Table S6** Strepsirrhine ( $n = 1$ ) lower molar proportions summary data

| Genus          | Species          | $n$ | $M_1$ area | $M_2$ area | $M_3$ area | $M_2/M_1$ | $M_3/M_1$ |
|----------------|------------------|-----|------------|------------|------------|-----------|-----------|
| <i>Varecia</i> | <i>variegata</i> | 4   | 33.65      | 30.09      | 16.82      | 0.89      | 0.50      |

source: [36].

**Table S7** Primate molar crown formation time data

| Genus            | Species             | $M_1$ Et* | $M_2$ Et | $M_3$ Et | Overlap* |
|------------------|---------------------|-----------|----------|----------|----------|
| <i>Macaca</i>    | <i>fascicularis</i> | 1.38      | 3.38     | 5.50     | -0.11    |
| <i>Macaca</i>    | <i>mulatta</i>      | 1.35      | 3.15     | 5.60     | -0.10    |
| <i>Papio</i>     | <i>cynocephalus</i> | 1.64      | 3.79     | 6.21     | 0.37     |
| <i>Gorilla</i>   | <i>gorilla</i>      | 3.50      | 6.58     | 10.38    | 0.29     |
| <i>Homo</i>      | <i>sapiens</i>      | 6.23      | 11.75    | 20.10    | -0.00    |
| <i>Pan</i>       | <i>troglydytes</i>  | 3.26      | 6.46     | 10.50    | 0.17     |
| <i>Pongo</i>     | <i>pygmaeus</i>     | 3.50      | 5.00     | 10.00    | 0.22     |
| <i>Hylobates</i> | <i>lar</i>          | 1.90      | 2.88     | 6.70     | 0.12     |
| <i>Varecia</i>   | <i>variegata</i>    | 0.48      | 0.69     | 1.13     | 0.38     |

\* Et = eruption time, Overlap = temporal overlap,  
sources: [37–42].

### Supplementary Figures

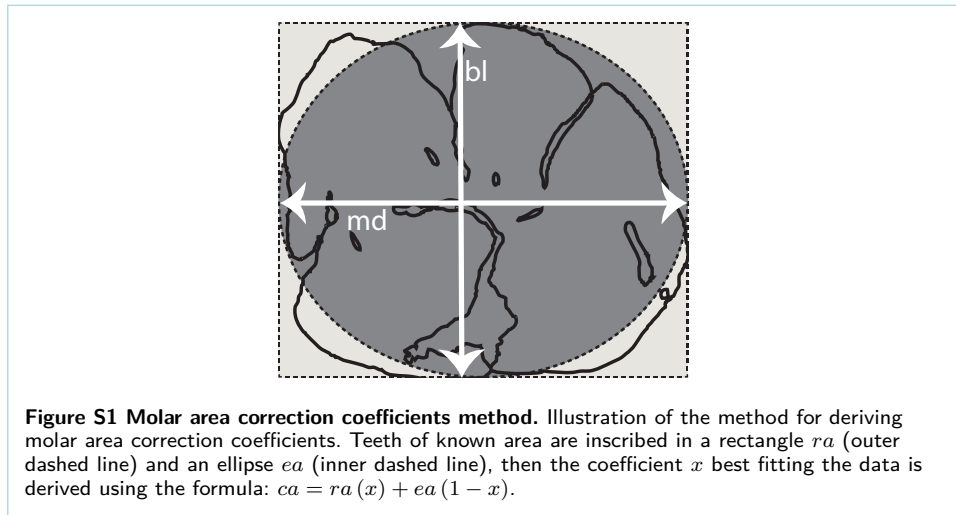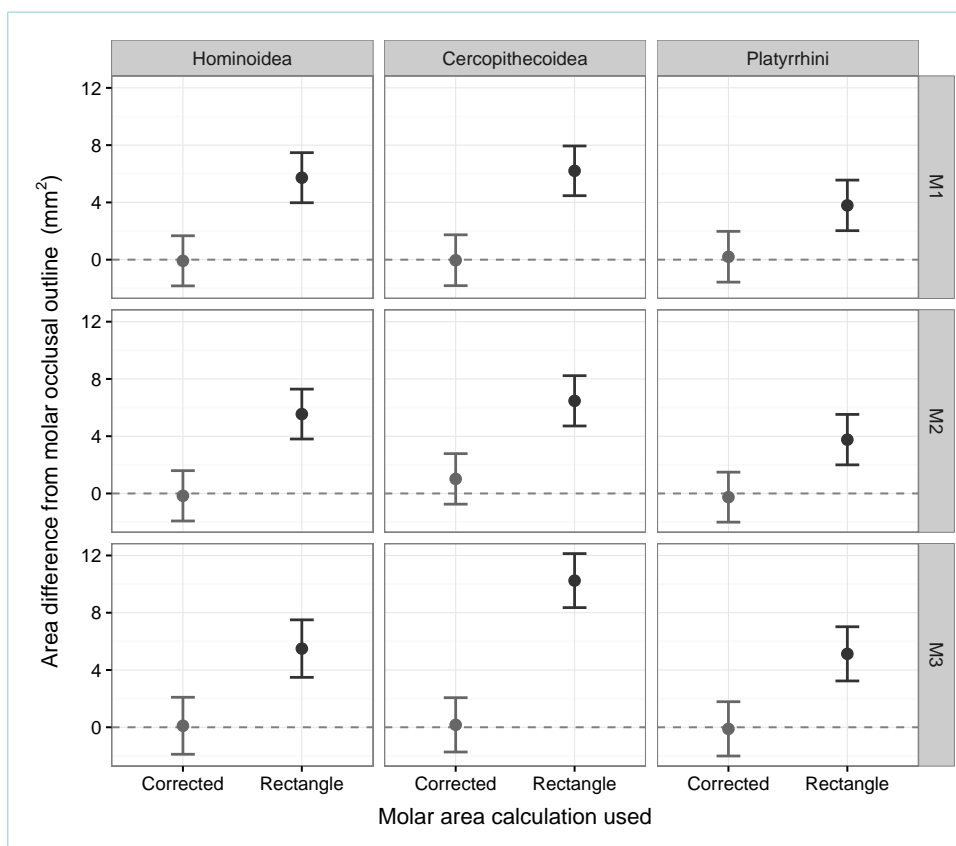

**Figure S2 Molar area correction coefficients test.** Differences in molar area (mm<sup>2</sup>) between those calculated by tracing polygons around molar occlusal outlines on photographs and those calculated: 1) as the product of linear length and breadth measurements ('rectangle'), and 2) using the correction coefficient method outline in the main article methods section ('corrected'). Points and error bars are mean estimates and 95% confidence intervals, respectively, from a mixed effects regression model. Comparisons are broken down by taxon and molar type.

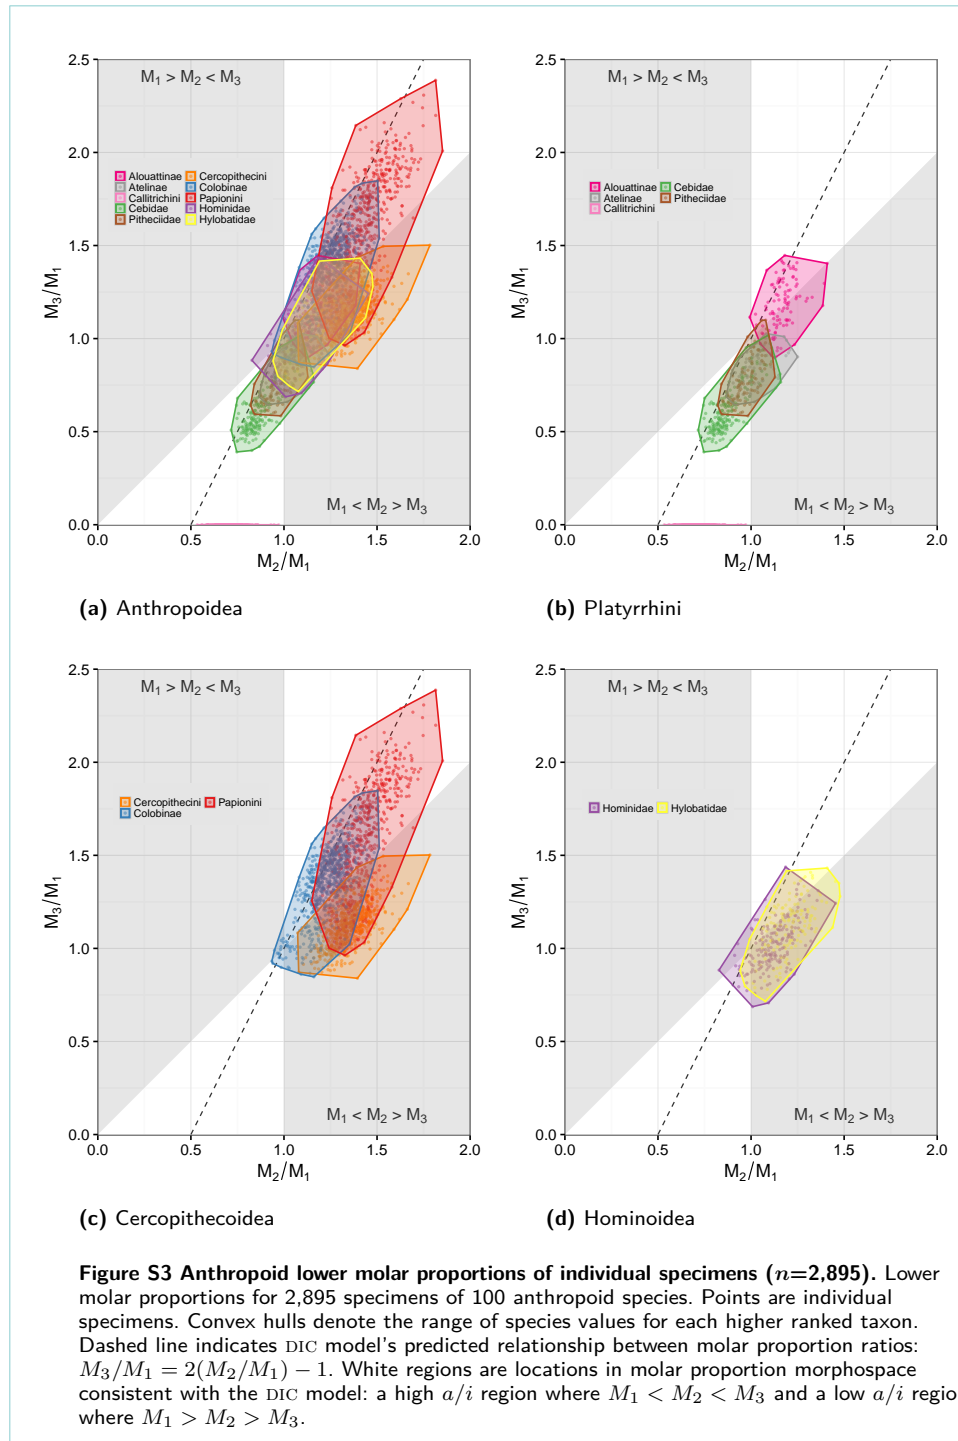

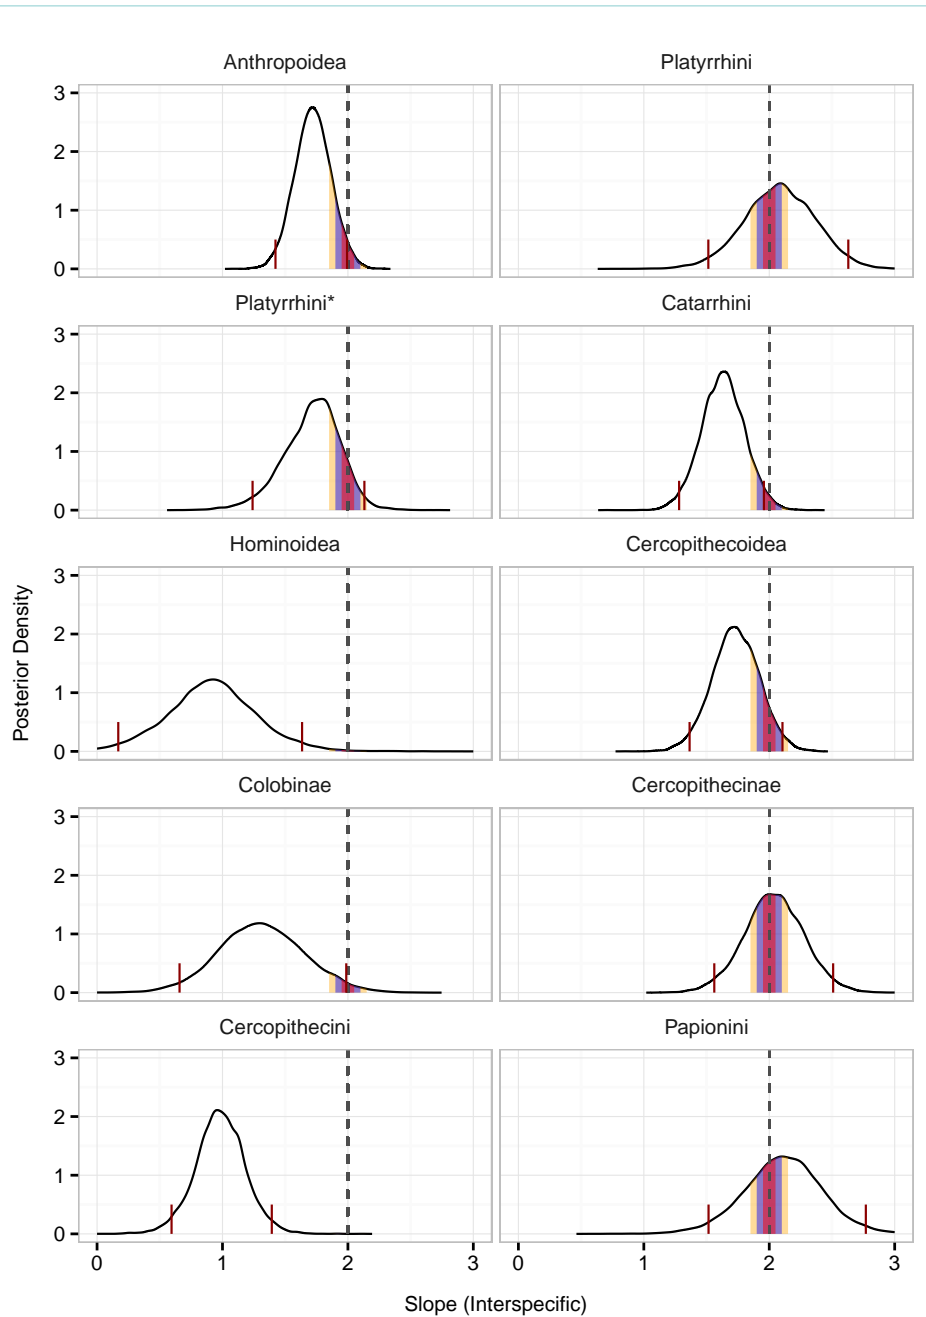

**Figure S4** Posterior density of molar area proportion slope (interspecific). Black solid line depicts posterior density of molar area proportion interspecific slope. Red solid lines depict 95% HDI. Black dashed line depicts DIC model expectation. Colored polygons within posterior density depict different ROPE sizes: red =  $\mathbb{P} \in [1.95, 2.05]$ , blue =  $\mathbb{P} \in [1.90, 2.10]$ , orange =  $\mathbb{P} \in [1.85, 2.15]$ . \*non-callitrichin platyrrhines.



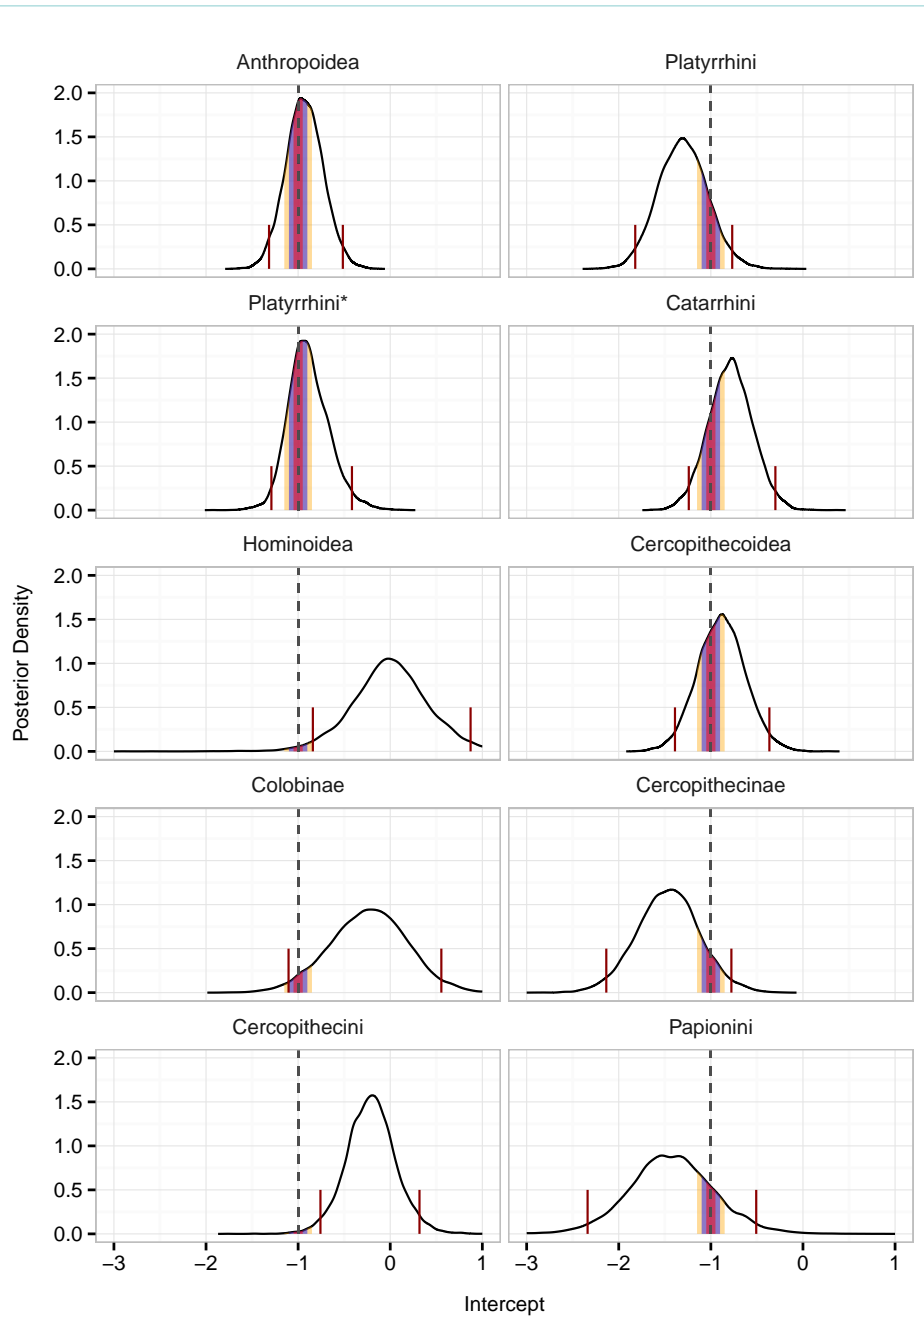

**Figure S5 Posterior density of molar area proportion intercept.** Black solid line depicts posterior density of molar area proportion intercept. Red solid lines depict 95% HDI. Black dashed line depicts DIC model expectation. Colored polygons within posterior density depict different ROPE sizes: red =  $\mathbb{P} \in [-0.95, -1.05]$ , blue =  $\mathbb{P} \in [-0.90, -1.10]$ , orange =  $\mathbb{P} \in [-0.85, -1.15]$ . \*non-callitrichin platyrrhines.

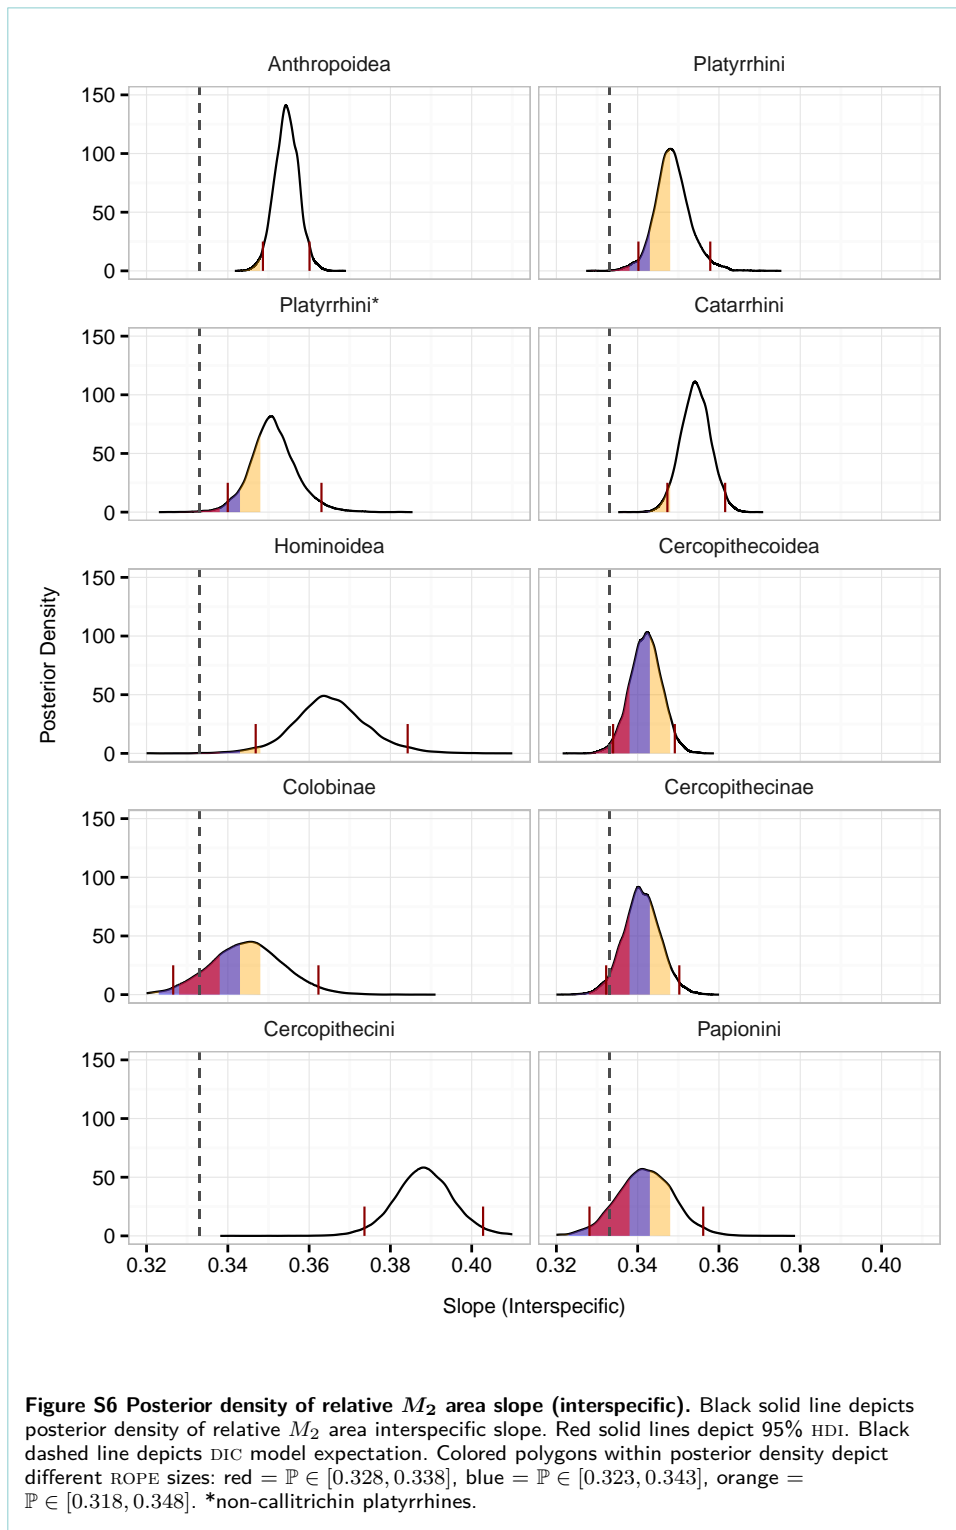

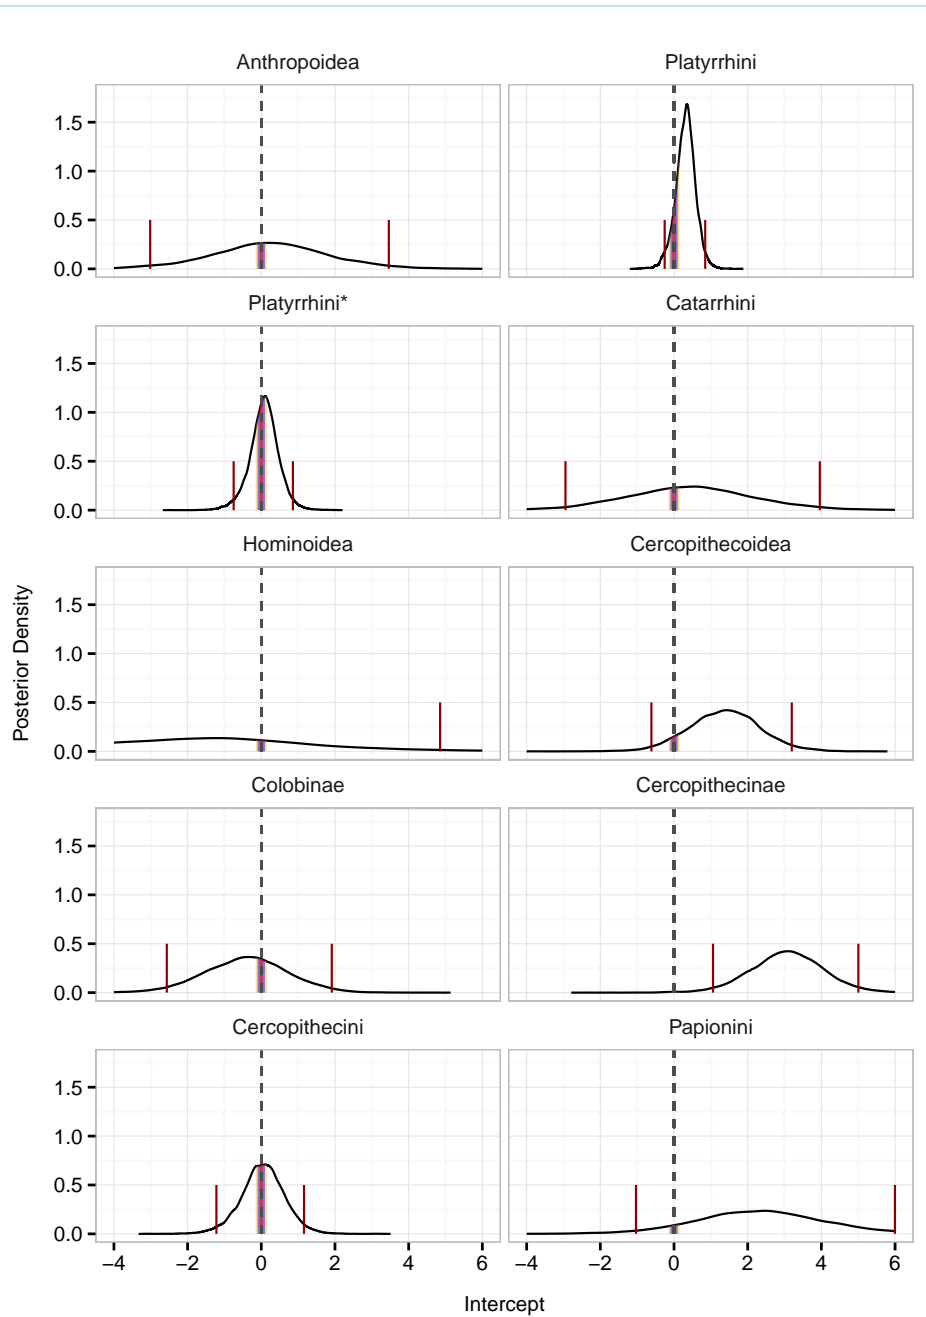

**Figure S7 Posterior density of relative  $M_2$  area intercept.** Black solid line depicts posterior density of relative  $M_2$  area intercept. Red solid lines depict 95% HDI. Black dashed line depicts DIC model expectation. Colored polygons within posterior density depict different ROPE sizes: red =  $\mathbb{P} \in [-0.05, 0.05]$ , blue =  $\mathbb{P} \in [-0.10, 0.10]$ , orange =  $\mathbb{P} \in [-0.15, 0.15]$ . \*non-callitrichin platyrrhines.

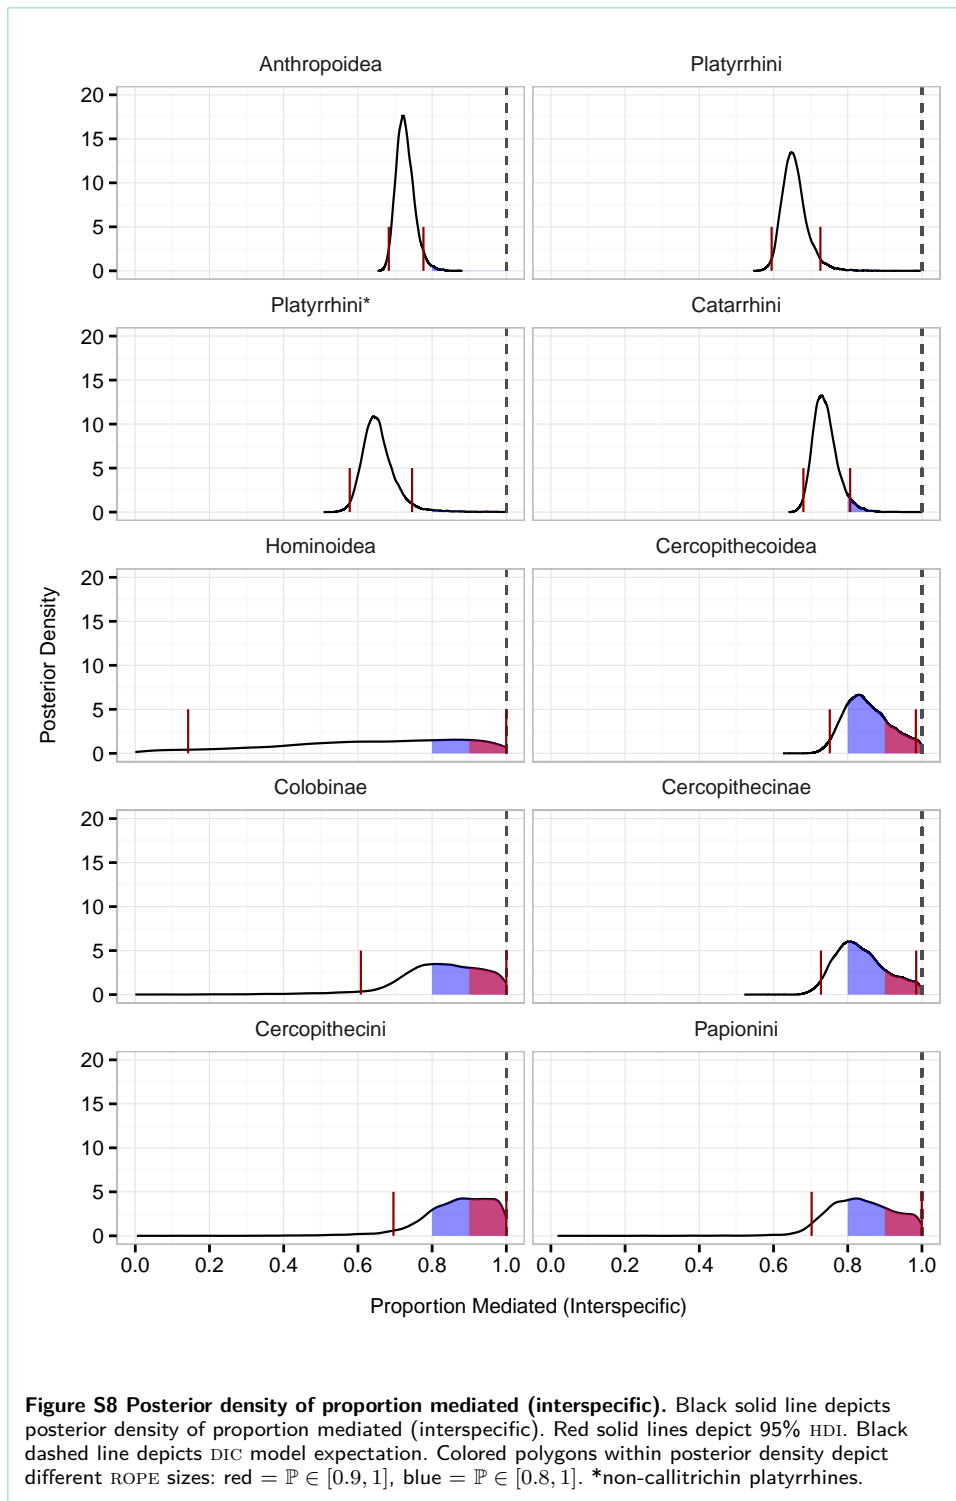

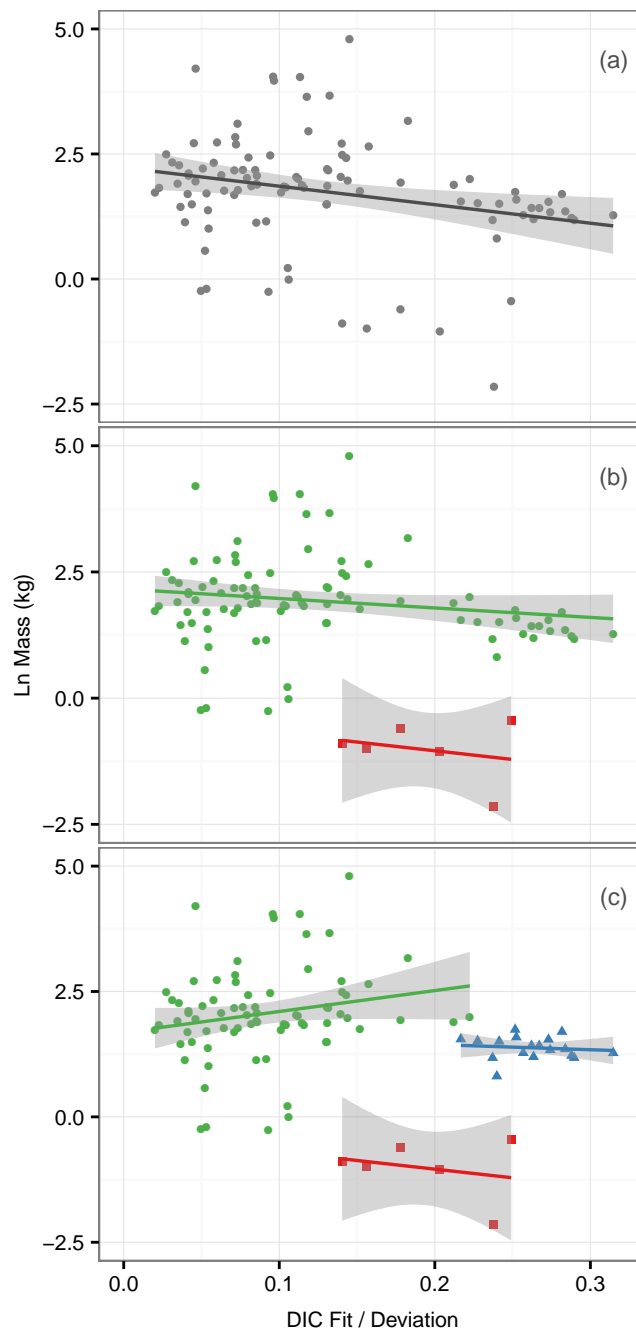

**Figure S9 Ln body mass as a function of fit/deviation from the DIC molar proportion model line.** Species mean Ln body mass as a function of absolute perpendicular fit/deviation from the DIC model line. (a) Pooled regression for all anthropoid ( $n = 100$ ) species. (b) Separate regression slopes and intercepts for callitrichins (red squares) and other anthropoids (green circles). (c) Separate regression slopes and intercepts for callitrichins (red squares), cercopithecins (blue triangles), and other anthropoids (green circles).

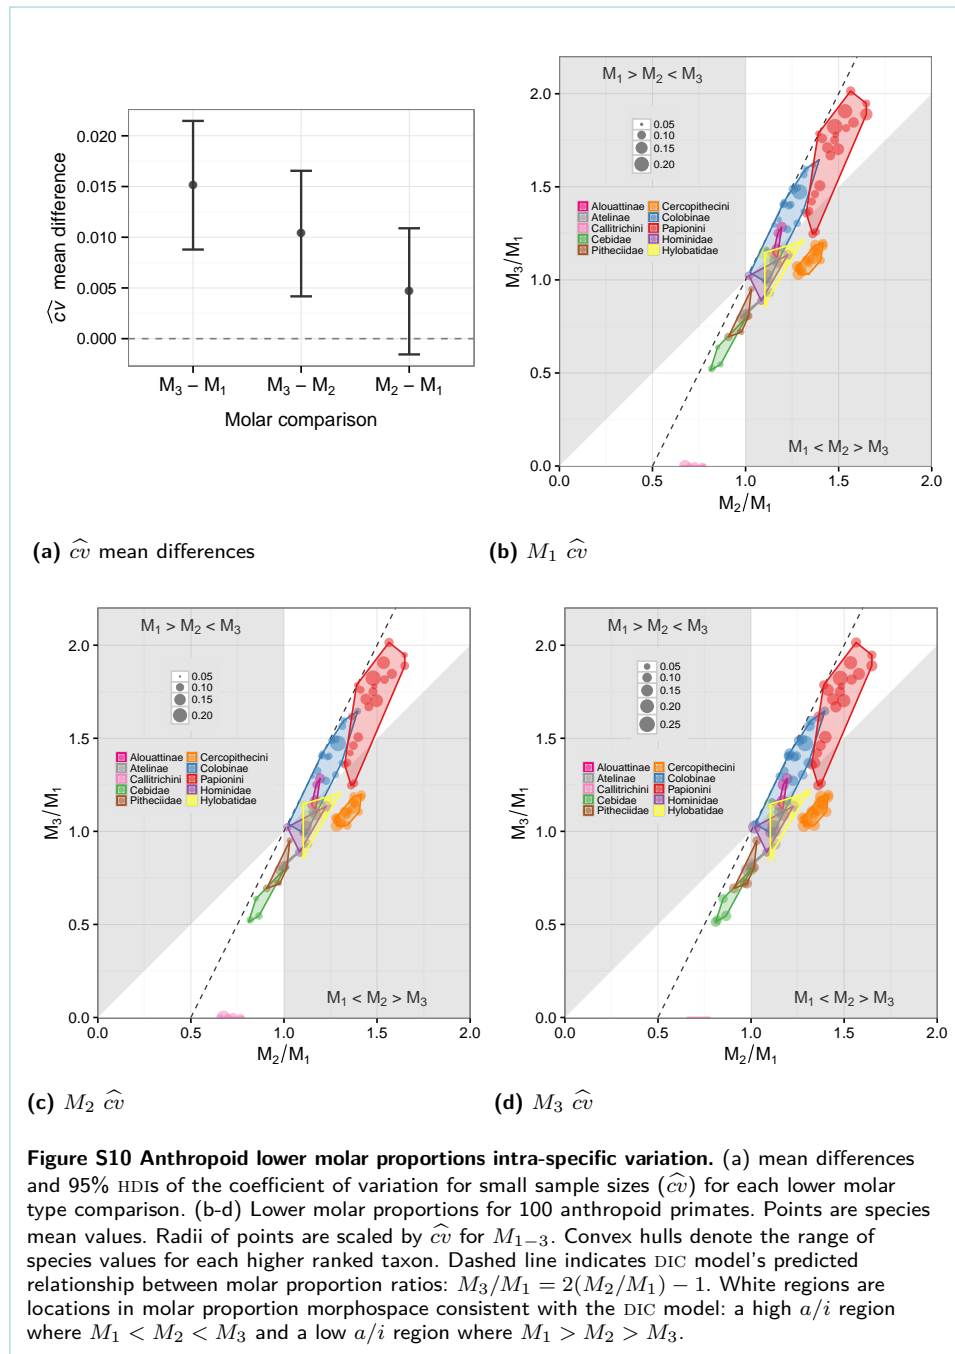

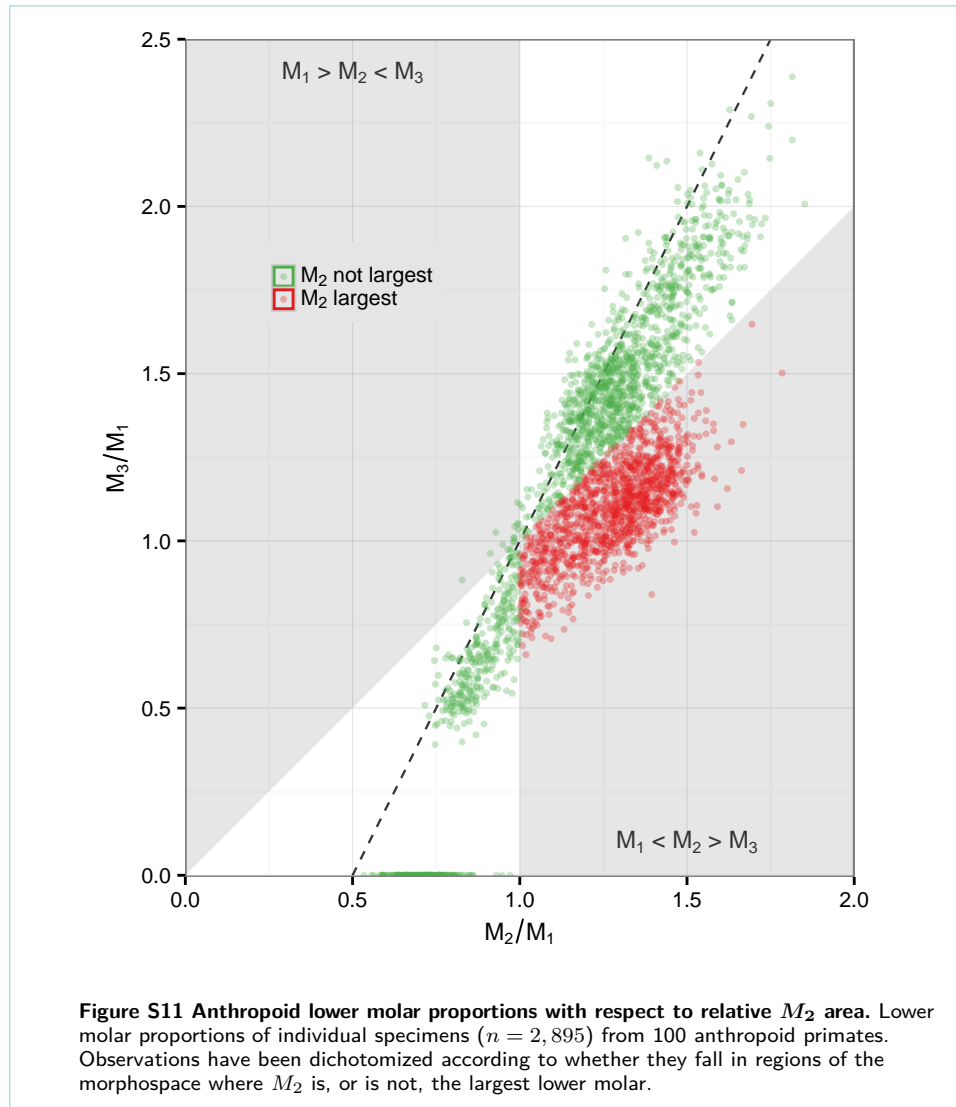

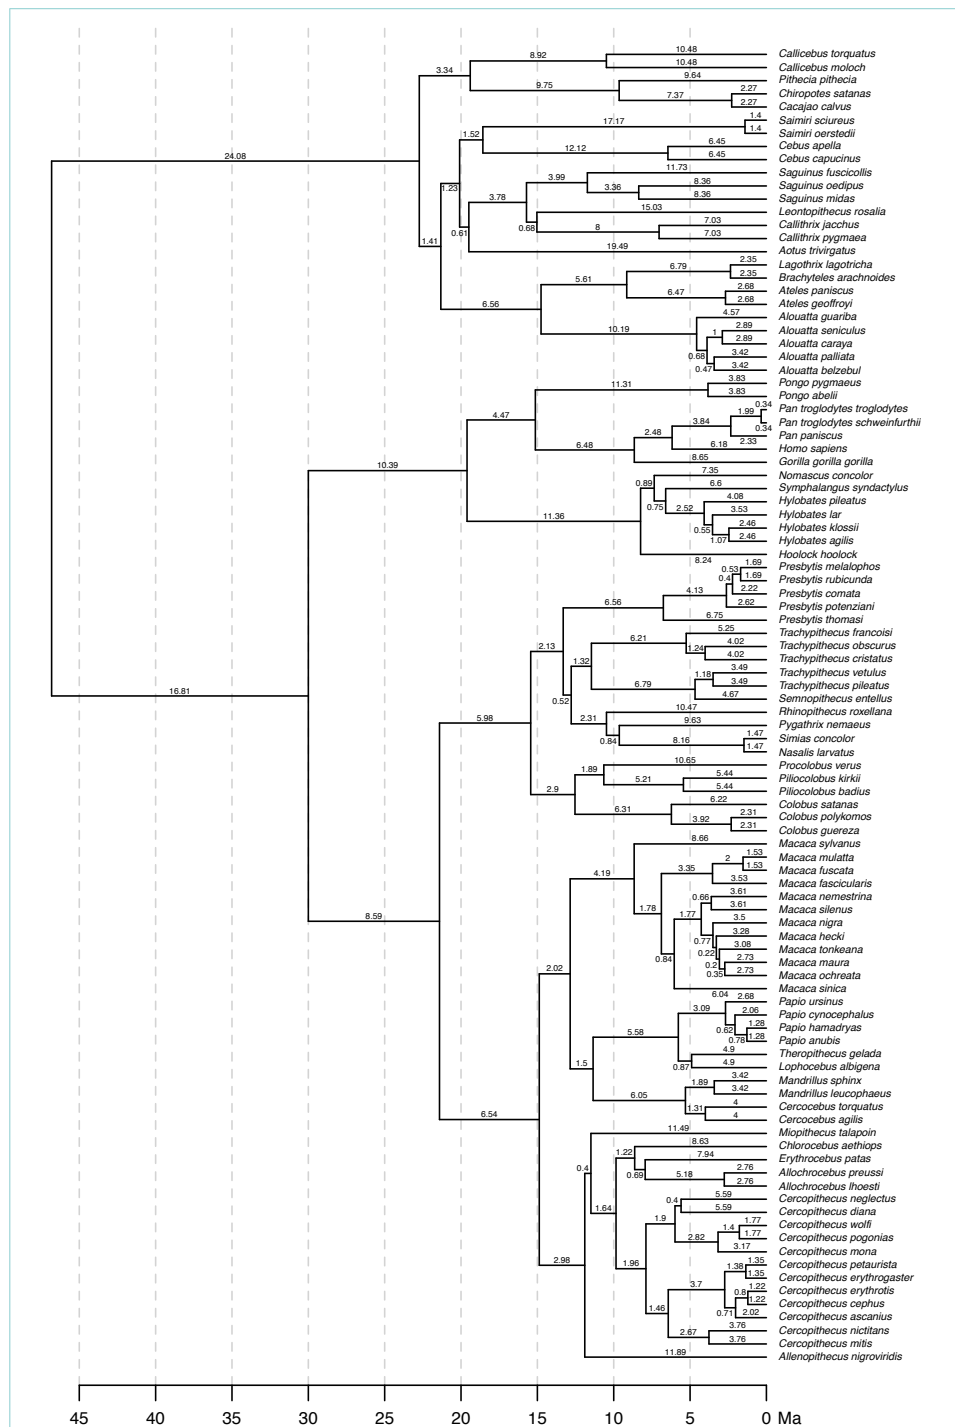

**Figure S12 Molecular phylogeny of anthropoid primates ( $n = 100$ ).** Molecular-based consensus phylogeny for 100 anthropoid primates. Topology and branch lengths were extracted from version 3 of the 10K Trees database of primate phylogenetic relationships [43].



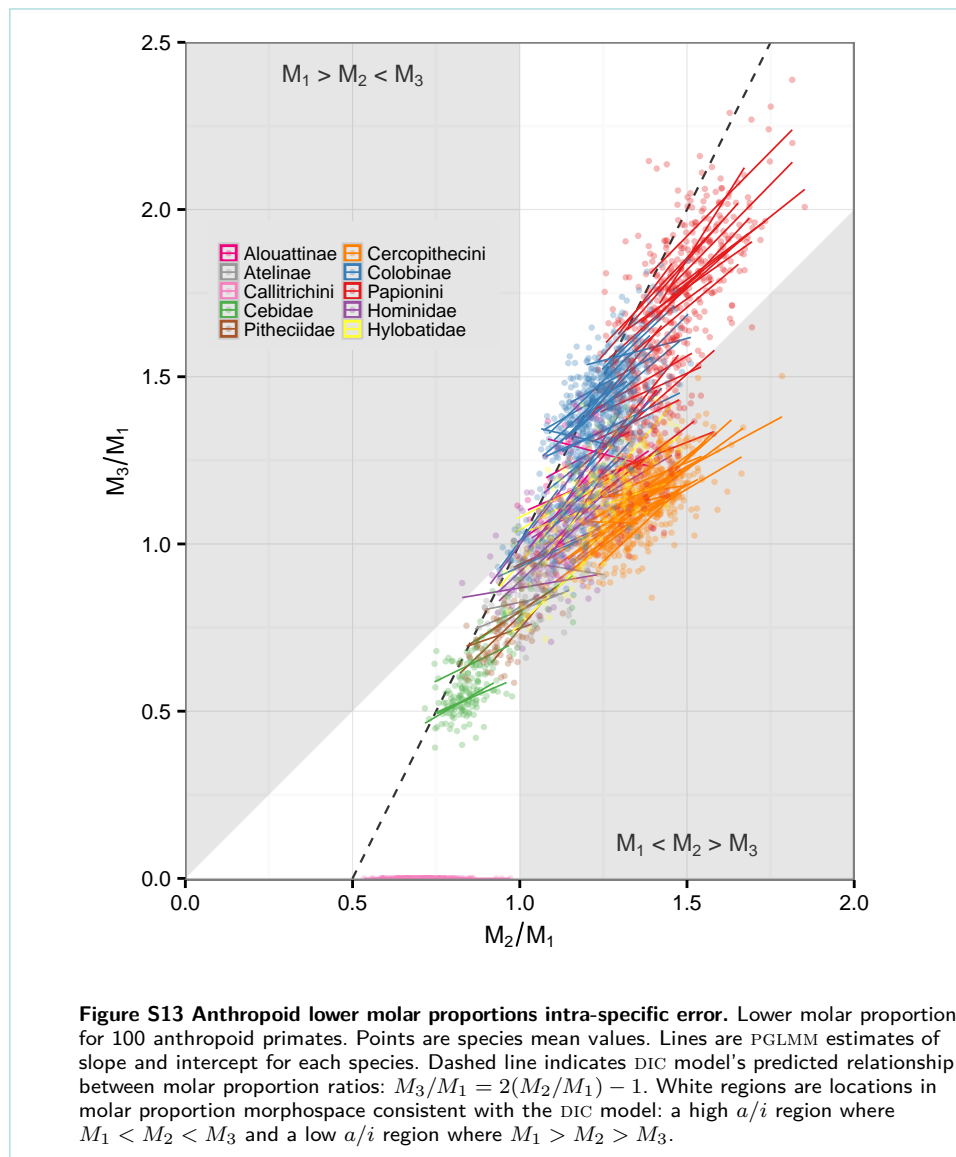

### Author details

<sup>1</sup>Department of Human Evolutionary Biology, Harvard University, 11 Divinity Avenue, 02138 Cambridge, USA.

<sup>2</sup>Institute for Quantitative Social Science, Harvard University, 1737 Cambridge Street, 02138 Cambridge, USA.

### References

- Colyn, M.: Données pondérales sur les primates Cercopithecidae d'Afrique Centrale (Bassin du Zaïre/Congo). *Mammalia* **58**, 483–487 (1994)
- Delson, E., Terranova, C.J., Jungers, W.L., Sargis, E.J., Jablonski, N.G., Dechow, P.C.: Body mass in Cercopithecidae (Primates, Mammalia): estimation and scaling in extinct and extant taxa. *Am Mus Nat Hist, Anthropol Papers* **83**, 1–159 (2000)
- Geissmann, T.: Evolution of Communication in Gibbons (Hylobatidae). Ph.D. Dissertation. PhD thesis, University of Zürich, Switzerland (1993)
- Gordon, A.D.: Scaling of size and dimorphism in Primates II: macroevolution. *Int J Primatol* **27**(1), 63–105 (2006)
- Holloway, R.L.: Within-species brain-body weight variability: a reexamination of the Danish data and other primate species). *Am J Phys Anthropol* **53**, 109–121 (1980)
- Peres, C.A.: Which are the largest New World monkeys? *J Hum Evol* **26**, 245–249 (1994)
- Smith, R.J., Jungers, W.L.: Body mass in comparative primatology. *J Hum Evol* **32**, 523–559 (1997)
- Bartlett, T.Q.: The hylobatidae: small apes of asia. In: Campbell, C.J., Fuentes, A., MacKinnin, K.C., Panger, M., Bearder, S.K. (eds.) *Primates in Perspective*, pp. 274–289. Oxford University Press, New York (2007)
- Beeson, M., Tame, S., Keeming, E., Lea, S.E.G.: Food habits of guenons (*Cercopithecus* spp.) in Afro-montane forest. *Afr J Ecol* **34**, 202–210 (1996)
- Bowler, M., Bodmer, R.E.: Diet and food choice in Peruvian red uakaris (*Cacajao calvus ucayalii*): selective or opportunistic seed predation? *Int J Primatol* **32**, 1109–1120 (2011)
- Buzzard, P.J.: Ecological partitioning of *Cercopithecus campbelli*, *C. petaurista* and *C. diana* in the Tai Forest. *Int J Primatol* **27**, 529–558 (2006)
- Chapman, C.A., Chapman, L.J., Cords, M., Gathua, J.M., Gautier-Hion, A., Lambert, J.E., Rode, K., Tutin, C.E.G., White, L.J.T.: Variation in the diets of *Cercopithecus* species: differences within forests, among forests, and across species. In: Glenn, M.E., Cords, M. (eds.) *The Guenons: Diversity and Adaptation in African Monkeys*, pp. 325–350. Kluwer Academic/Plenum Publishers, New York (2002)
- Chiarello, A.G.: Diet of the brown howler monkey *Alouatta fusca* in a semi-deciduous forest fragment of Southeastern Brazil. *Primates* **35**(1), 25–34 (1994)
- Chivers, D.: *The Siamang in Malaya: A Field Study of a Primate in Tropical Rain Forest*. Karger, Basel (1974)
- de Castro, C.S.S., Araujo: Diet and feeding behavior of marmoset, *Callithrix Jacchus*. *Rev Brasil Ecol* **7**, 14–19 (1996)
- Enstam, K.L., Isbell, L.A.: The guenons (genus *Cercopithecus*) and their allies. In: Campbell, C.J., Fuentes, A., MacKinnin, K.C., Panger, M., Bearder, S.K. (eds.) *Primates in Perspective*, pp. 252–274. Oxford University Press, New York (2007)
- Kane, E.E., Bitty, E.A., McGraw, W.S.: Influence of association with red colobus (*Procolobus badius*) on the feeding ecology of Diana monkeys (*Cercopithecus diana*) in the Ivory Coast's Tai Forest. *Am J Phys Anthropol* **554**, 177–177 (2012)
- Kaplin, B.: Ranging behaviors of two species of guenons (*Cercopithecus lhoesti* and *C. mitis doggetti*) in the Nyungwe forest reserve, Rwanda. *International Journal of Primatology* **22**(4), 521–548 (2001)
- Koenig, A., Borries, C.: Socioecology of Hanuman langurs: the story of their success. *Evol Anthropol* **10**, 122–137 (2001)
- Pavelka, M.S.M., Knopff, K.H.: Diet and activity in black howler monkeys (*Alouatta pigra*) in southern Belize: does degree of frugivory influence activity level? *Primates* **45**, 105–111 (2004)
- Peres, C.A.: Diet and feeding ecology of gray woolly monkeys (*Lagothrix lagothricha cana*) in Central Amazonia: comparisons with other atelines. *Int J Primatol* **15**(3), 333–372 (1994)
- Pinto, L.P., Setz, E.Z.: Diet of *Alouatta belzebul discolor* in an Amazonian rain forest of Northern Mato Grosso State, Brazil. *Int J Primatol* **25**(6), 1197–1211 (2004)
- Porter, L.M.: Dietary differences among sympatric callitrichines in northern Bolivia: *Callimico goeldii*, *Saguinus fuscicollis* and *Saguinus labiatus*. *Int J Primatol* **22**(6), 961–992 (2001)
- Prates, H.M., Bicca-Marques, J.C.: Age-sex analysis of activity budget, diet, and positional behavior in *Alouatta caraya* in an orchard forest. *Int J Primatol* **29**, 703–715 (2008)
- Preece, G.: Factors influencing variation in the population densities of *Colobus guereza*, within selectively logged forest at the Budongo Forest Reserve. In: Newton Fisher, N.E., Norman, H., Paterson, J.D., Reynolds, V. (eds.) *Primates of Western Uganda*, pp. 23–43. Springer, New York (2006)
- Priston, N.E.C.: Crop-raiding by *Macaca ochreata brunnescens* in Sulawesi: Reality, perceptions and outcomes for conservation. PhD thesis, University of Cambridge, Cambridge (2005)
- Quyet, L.K., Duc, N.A., Tai, V.A., Wright, B.W., Covert, H.H.: Diet of the Tonkin snub-nosed monkey (*Rhinopithecus avuncular*) in the Khu Ca area, Ha Giang Province, Northeastern Vietnam. *Vietnamese J Primatol* **1**, 75–83 (2007)
- Raemaekers, J.J.: Ecology of sympatric gibbons. *Folia Primatol* **31**, 227–245 (1979)
- Robinson, J.G., Redford, K.H.: Body size, diet, and population density of Neotropical forest mammals. *Am Nat* **128**, 665–680 (1986)
- Rosenberger, A.L.: Evolution of feeding niches in New World monkeys. *Am J Phys Anthropol* **88**, 525–562 (1992)
- Sarmiento, E.E., Kingdon, J.: *Cercopithecus denti* Dent's Monkey. In: Butynski, T.M., Kingdon, J., Kalina, J. (eds.) *Mammals of Africa. Volume II: Primates*, pp. 330–333. Bloomsbury Publishing, London (2013)
- Silver, S.C., Ostro, L.E.T., Yeager, C.P., Horwich, R.: Feeding ecology of the black howler monkey (*Alouatta pigra*) in Northern Belize. *Am J Primatol* **45**, 263–279 (1998)

33. Tsuji, Y., Fujita, S., Sugiura, H., Saito, C., Takatsuki, S.: Long-term variation in fruiting and the food habits of wild Japanese macaques on Kinkazan Island, northern Japan. *Am J Primatol* **68**, 1068–1080 (2006)
34. Zeeve, S.R.: Swamp monkeys of the Lomako Forest, Central Zaire. *Primate Conservation* **5**, 32–33 (1985)
35. Zhou, Q., Wei, F., Li, M., Huang, C., Luo, B.: Diet and food choice of (*Trachypithecus francoisi*) in the Nonggang Nature Reserve, China. *Int J Primatol* **27**(5), 1441–1460 (2006)
36. Swindler, D.R.: *Primate Dentition: An Introduction to the Teeth of Non-human Primates*. Cambridge University Press, Cambridge (2002)
37. Beynon, A.D., Dean, M.C., Reid, D.J.: Histological study on the chronology of the developing dentition in *Gorilla* and *Orangutan*. *Am J Phys Anthropol* **86**, 189–203 (1991)
38. Reid, D.J., Beynon, A.D., Ramirez Rozzi, F.V.: Histological reconstruction of dental development in four individuals from a medieval site in Picardie, France. *J Hum Evol* **35**, 463–477 (1998)
39. Schwartz, G.T., Mahoney, P., Godfrey, L.R., Cuzzo, F.P., Jungers, W.L., Randria, G.F.N.: Dental development in *Megaladapis edwardsi* (Primates, Lemuriformes): implications for understanding life history variation in subfossil lemurs. *J Hum Evol* **49**, 702–721 (2005)
40. Schwartz, G.T., Reid, D.J., Dean, M.C., Zihlman, A.L.: A faithful record of stressful life events preserved in the dental developmental record of a juvenile *Gorilla*. *Int J Primatol* **27**(4), 1201–1219 (2006)
41. Dirks, W., Bowman, J.E.: Life history theory and dental development in four species of catarrhine primates. *J Hum Evol* **53**, 309–320 (2007)
42. Smith, T.M., Reid, D.J., Dean, M.C., Olejniczak, A.J., Martin, L.B.: Molar development in common chimpanzees (*Pan troglodytes*). *J Hum Evol* **52**(2), 201–216 (2007)
43. Arnold, C., Matthews, L.J., Nunn, C.L.: The 10kTrees website: a new online resource for primate phylogeny. *Evol Anthropol* **19**(3), 114–118 (2010)
